# Supplementary material
Source: publisher figshare collection journal article supplement (https://karger.figshare.com/ndownloader/files/14500643)

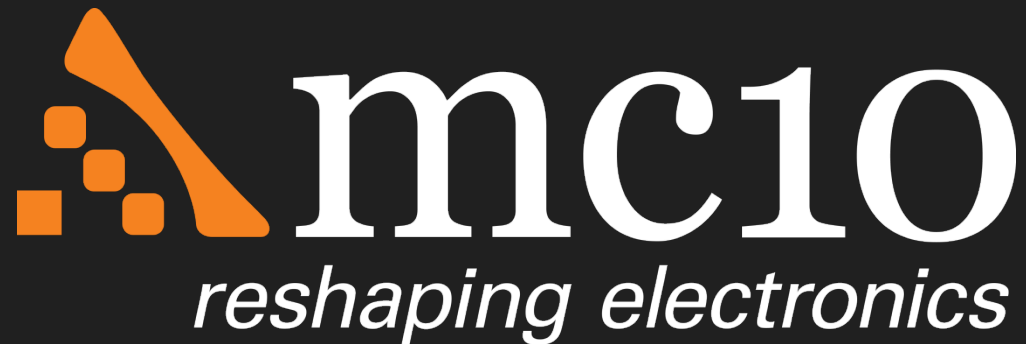

**DIGITAL BIOMARKERS Research Article Submission**  
**MANUSCRIPT SUPPLEMENTARY FIGURES for:**

**“A Pivotal Study to Validate Performance of a Novel Wearable Sensor and System for Biometric Monitoring in Clinical and Remote Environments”**

# Supplementary Figure 1: BioStamp nPoint Data Flow Architecture (a)

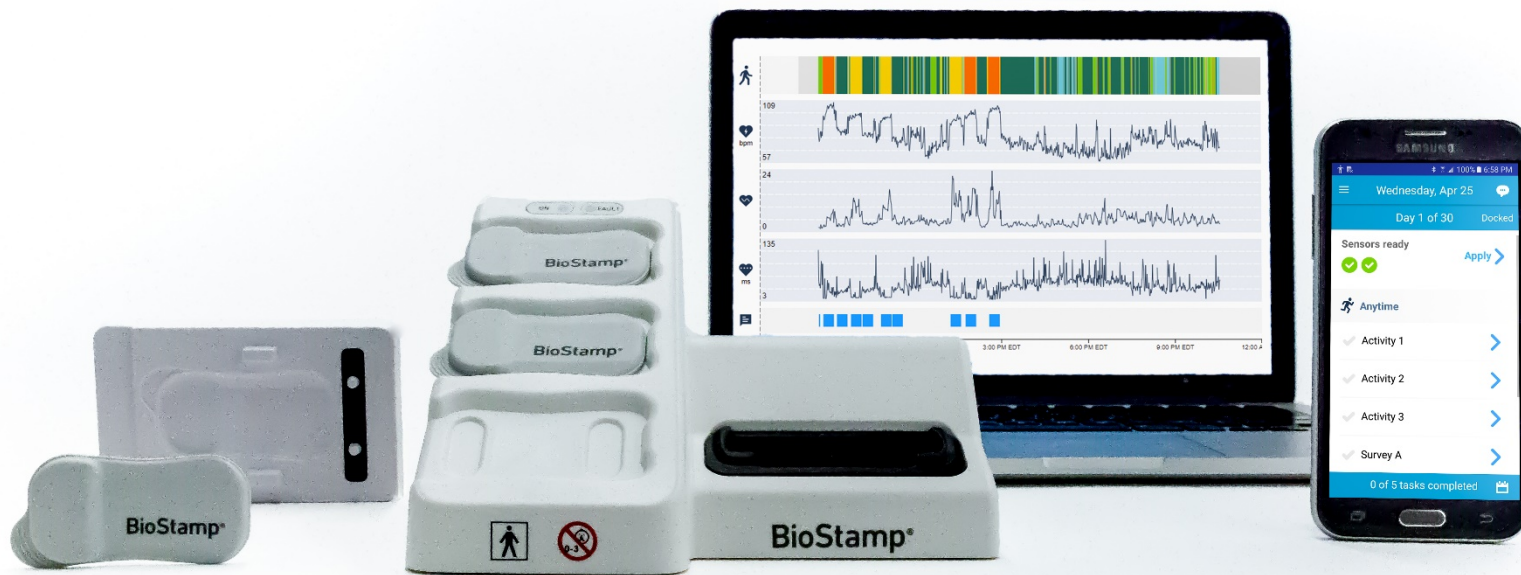

# Supplementary Figure 1: BioStamp nPoint Data Flow Architecture (b)

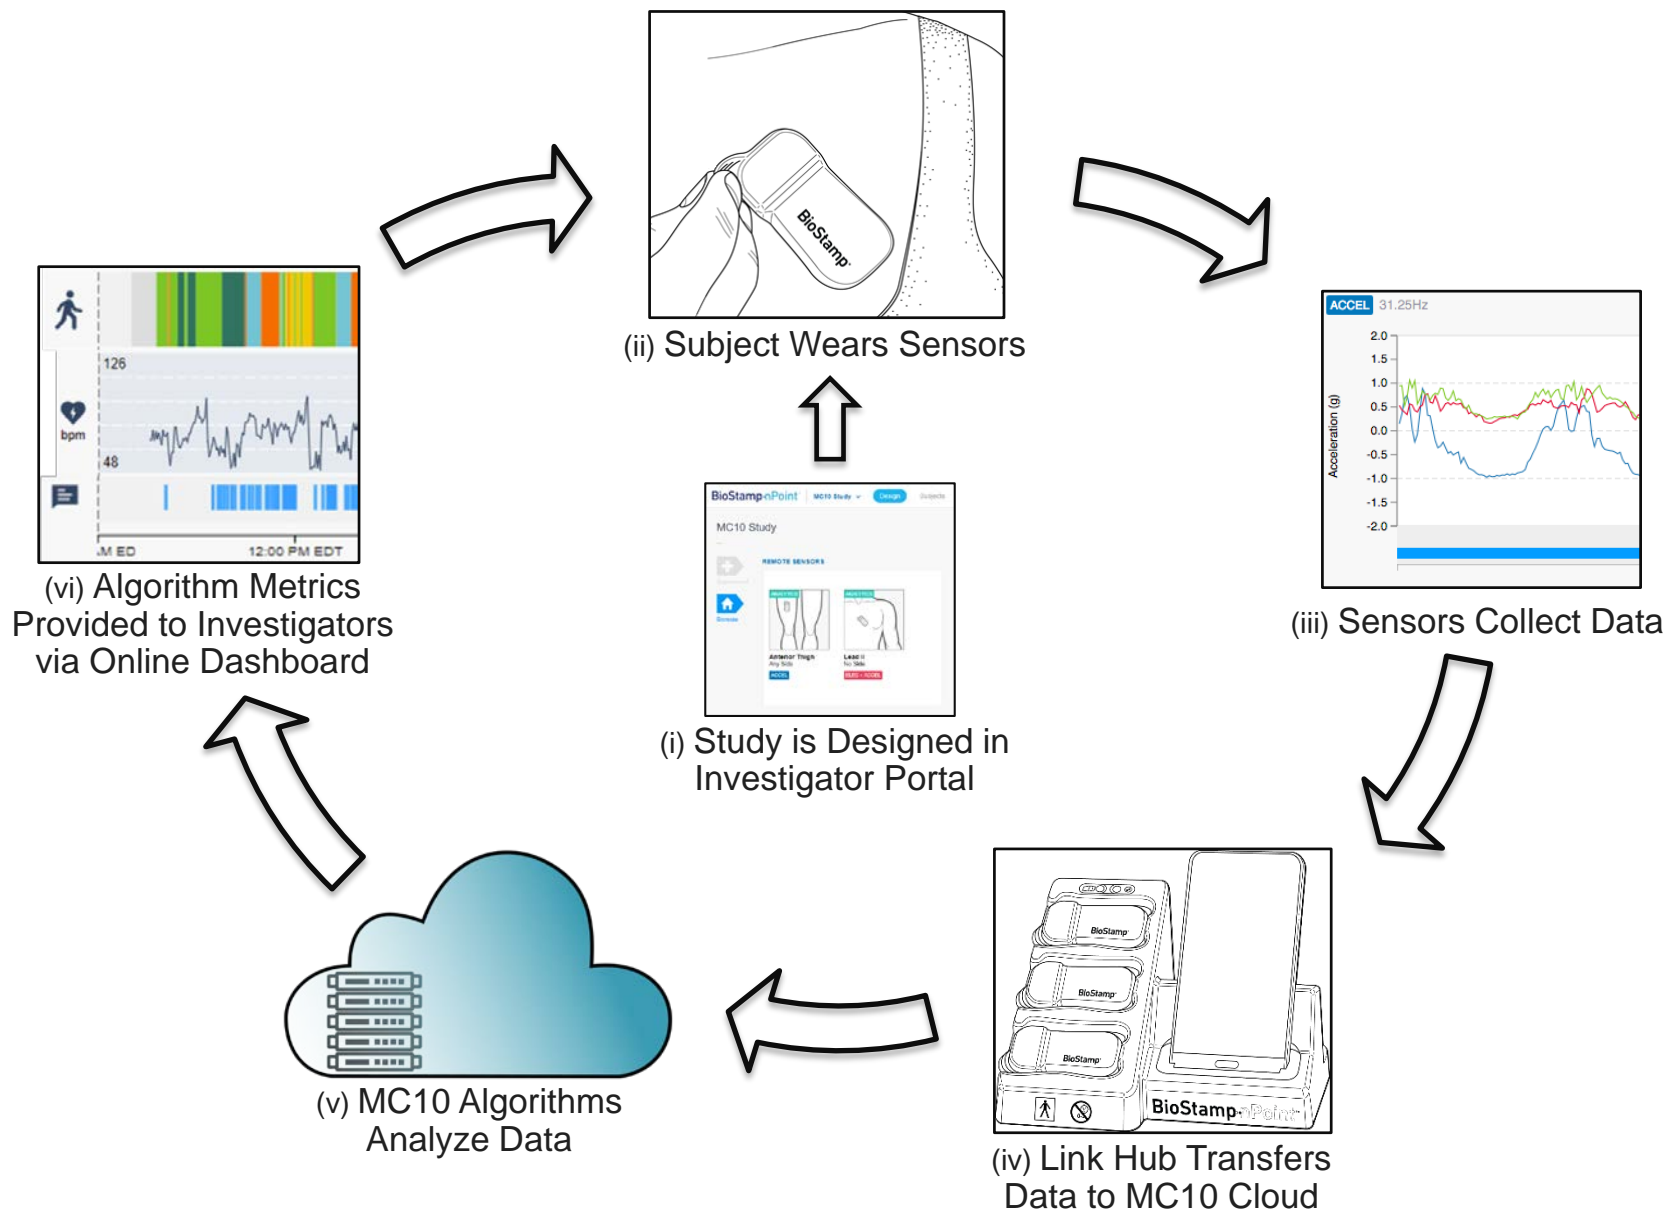

Supplement: Supplementary file 1 [file 14500643]
